# Supplementary figures and images for: iTBS improves behavioral abnormalities and synaptic defects in Fmr1 KO rats by regulating the autophagy pathway
Source: Research Square preprint supplement (doi:10.21203/rs.3.rs-7657461/v1), 2025-10-14

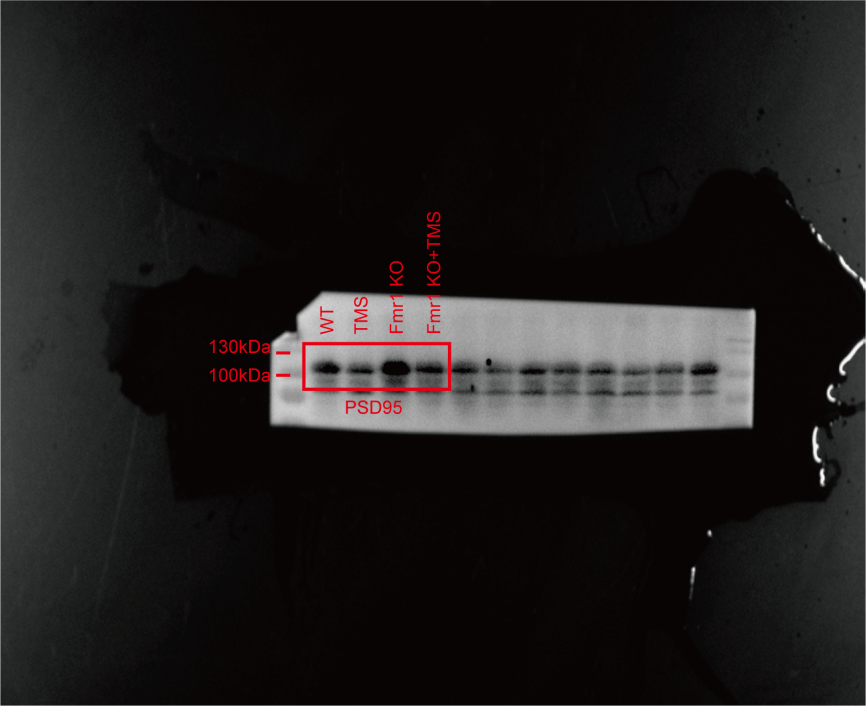

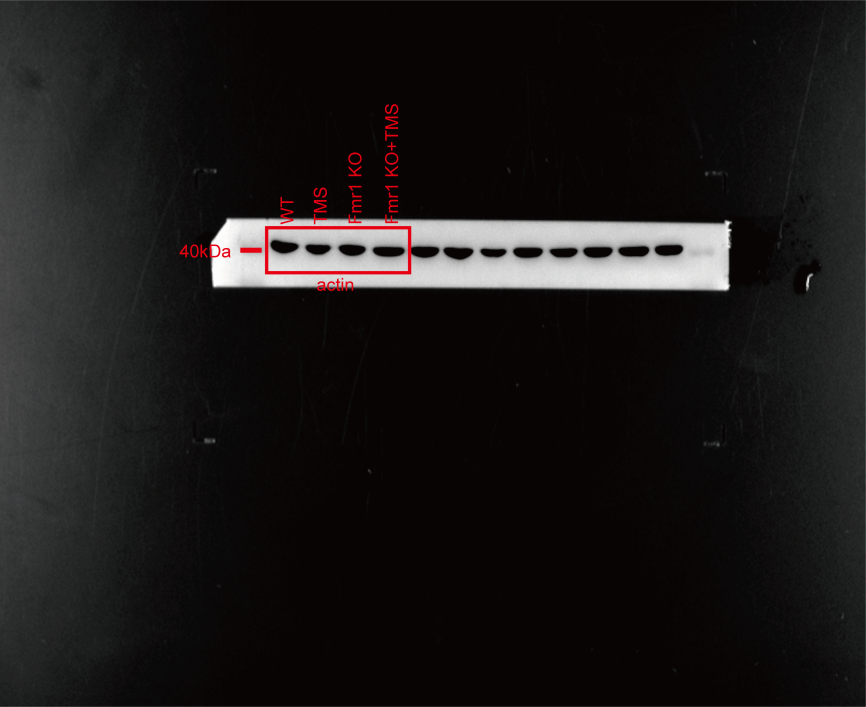


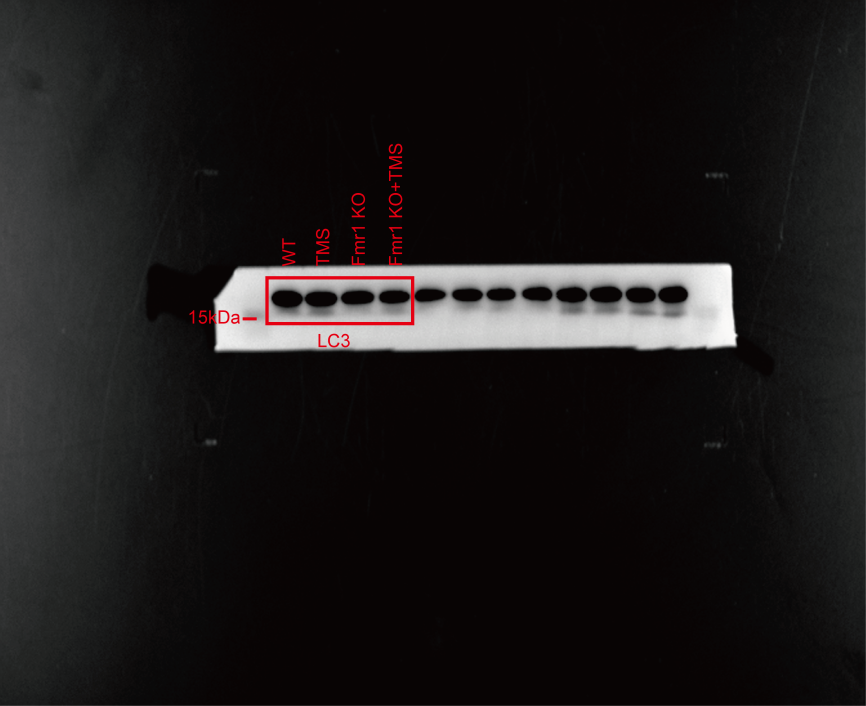

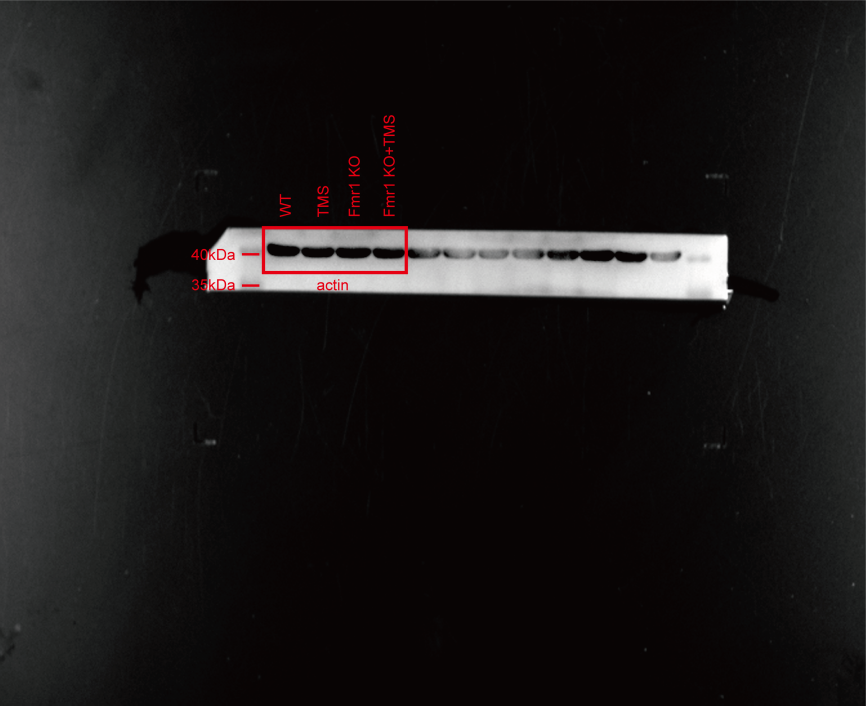

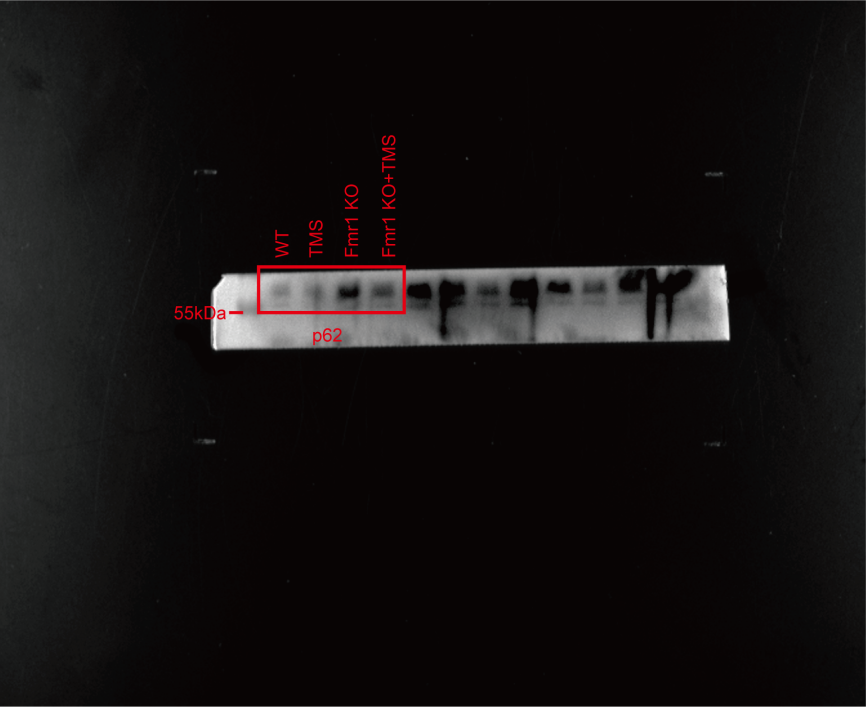

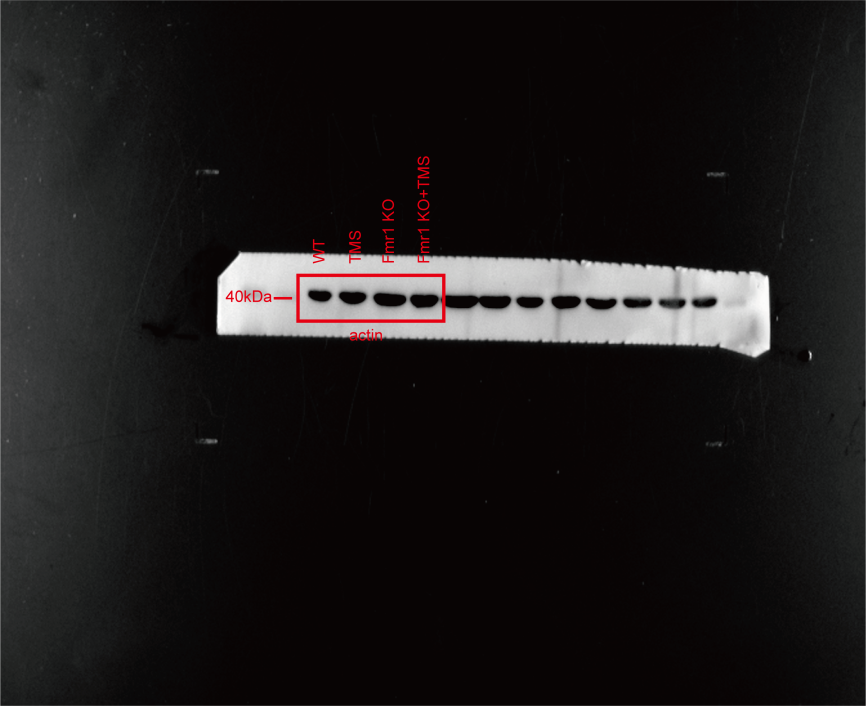


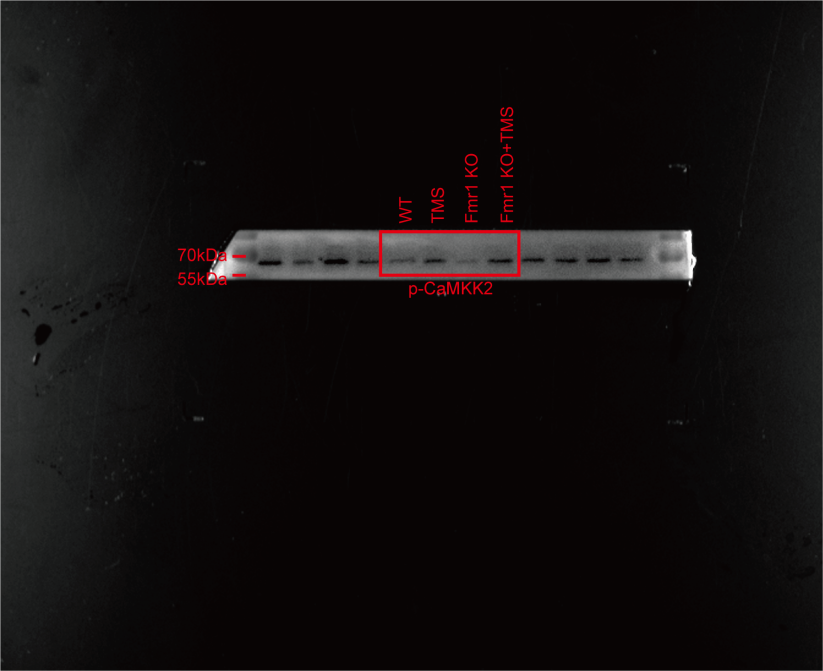

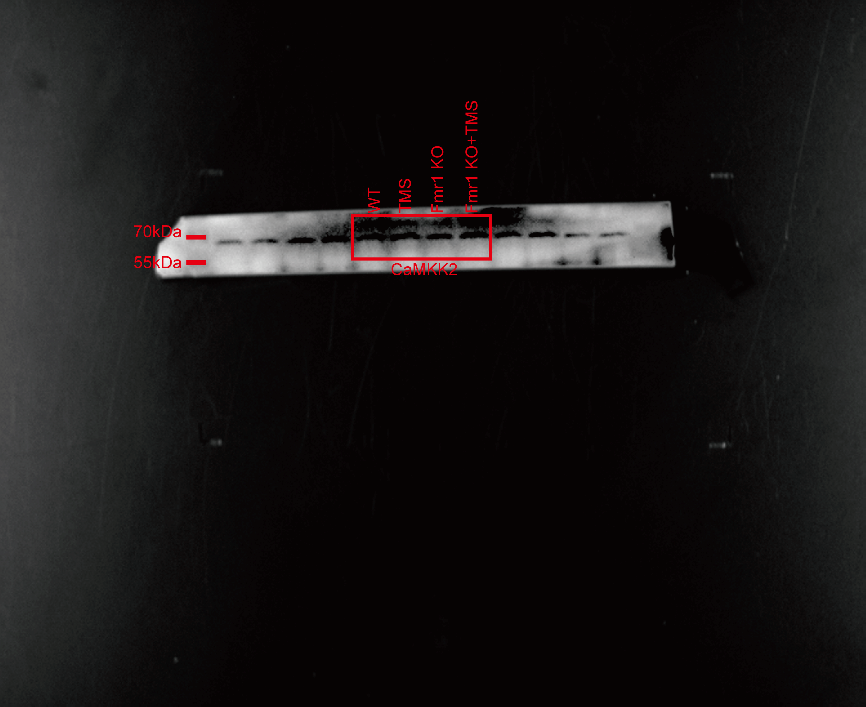

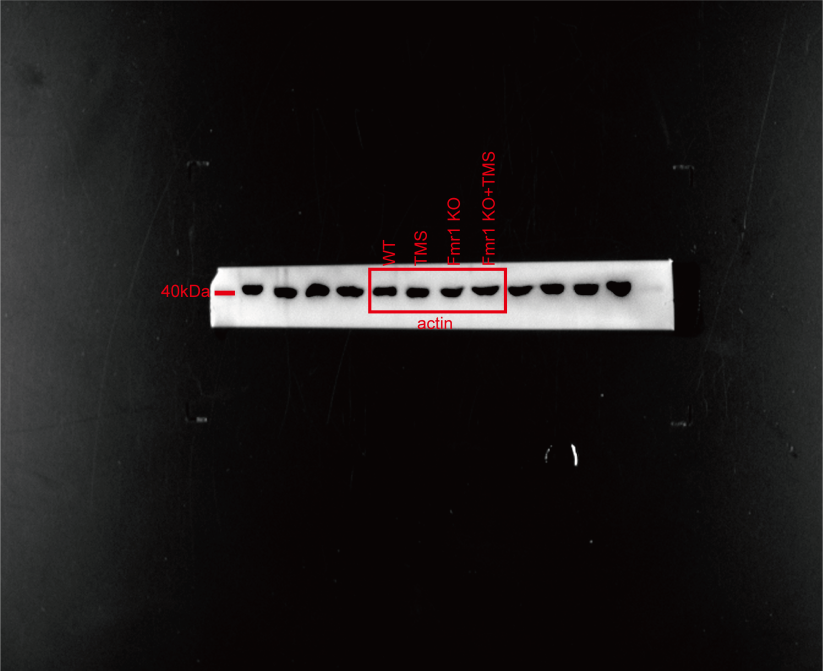

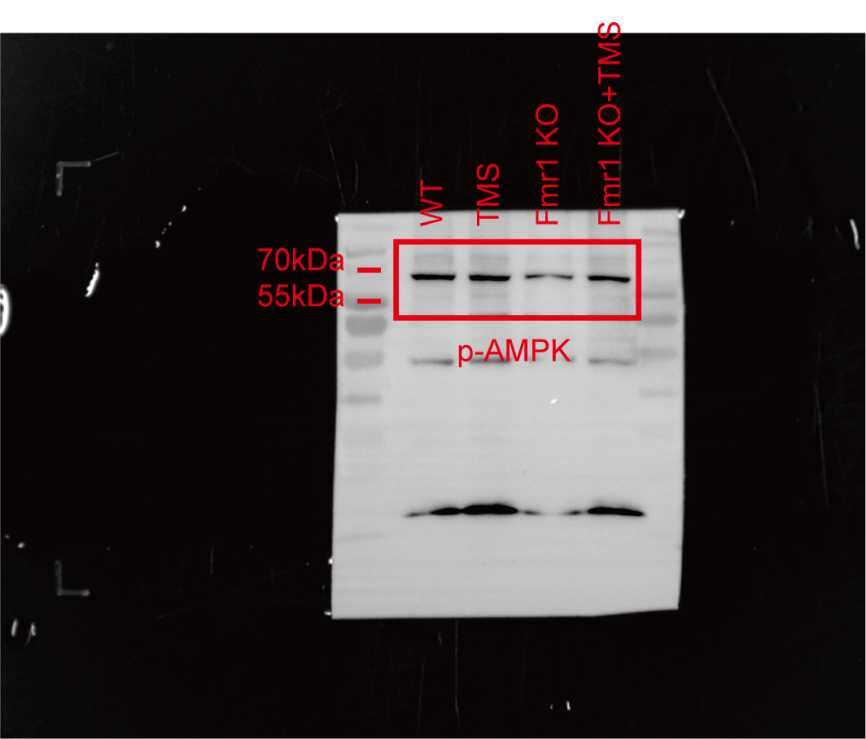

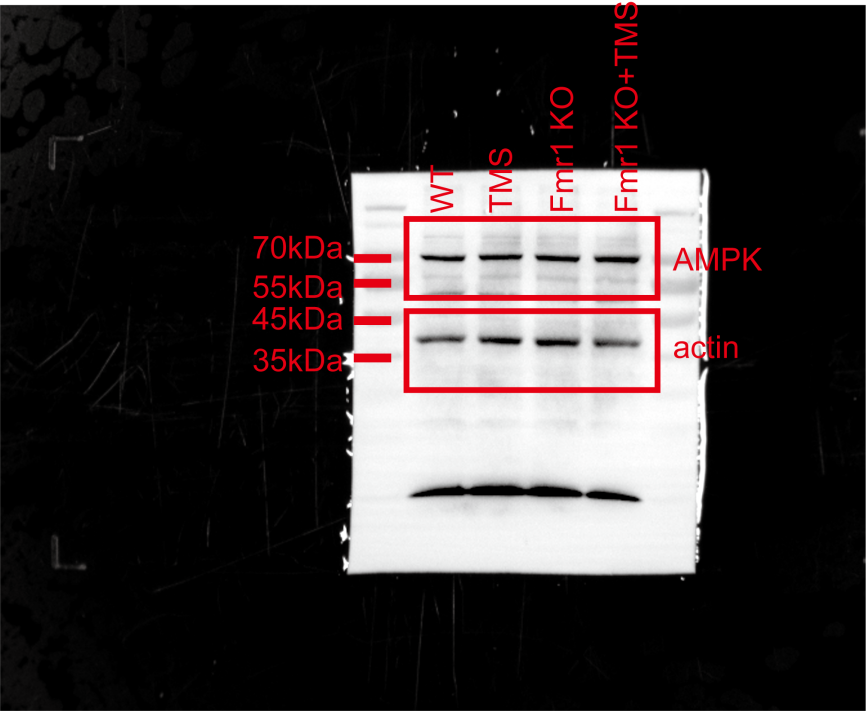


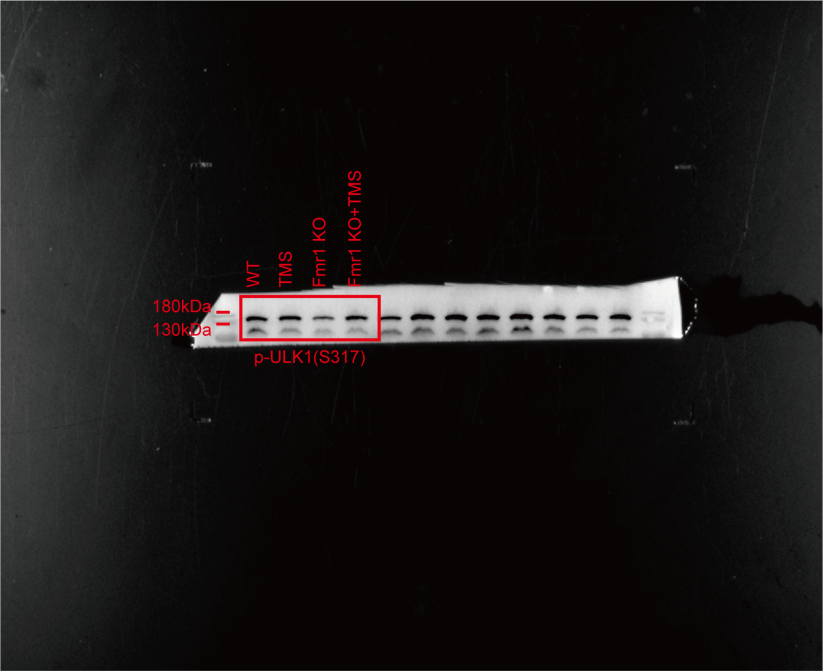

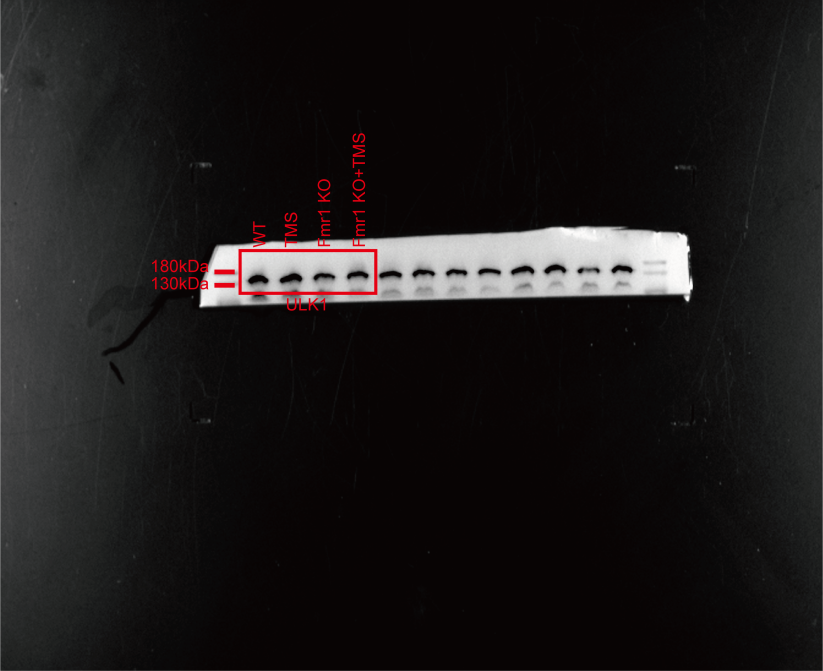

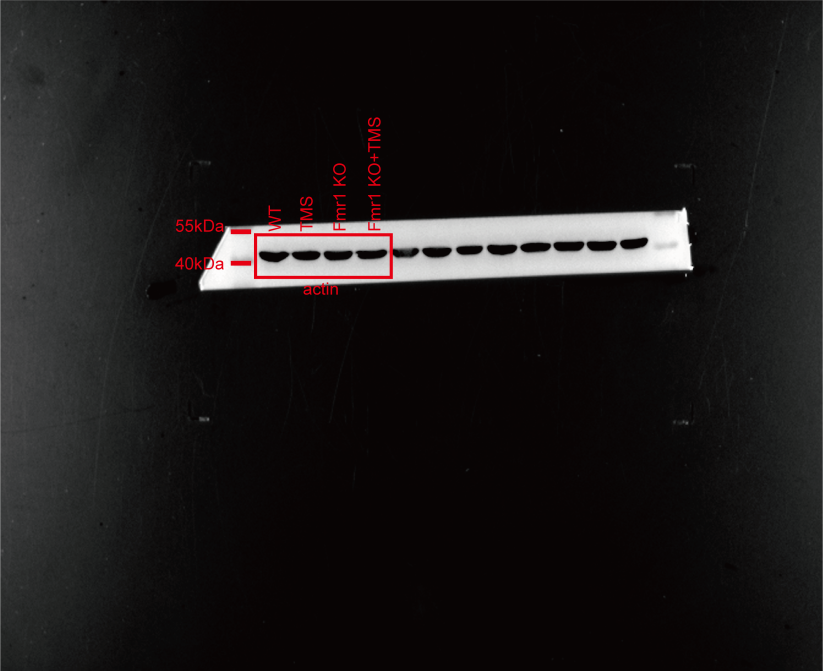

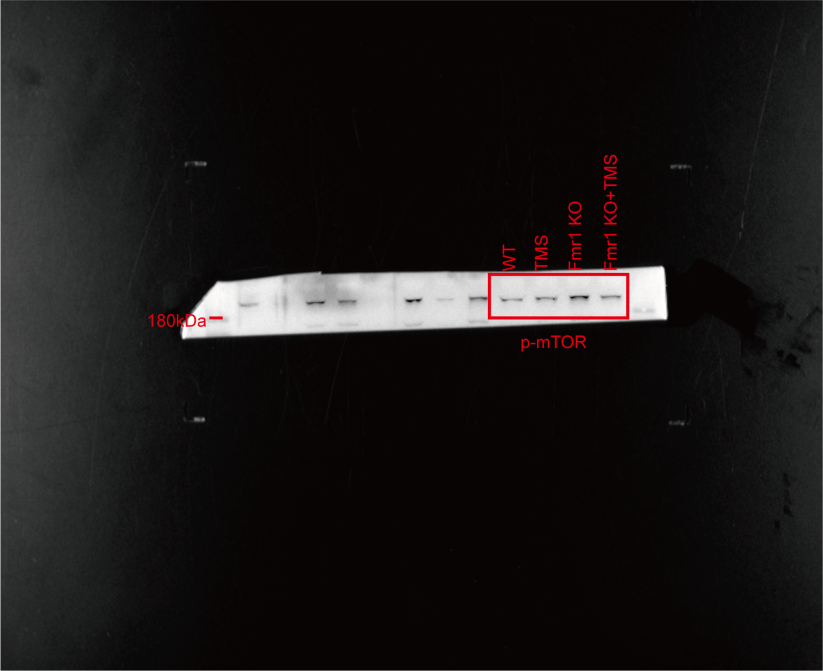

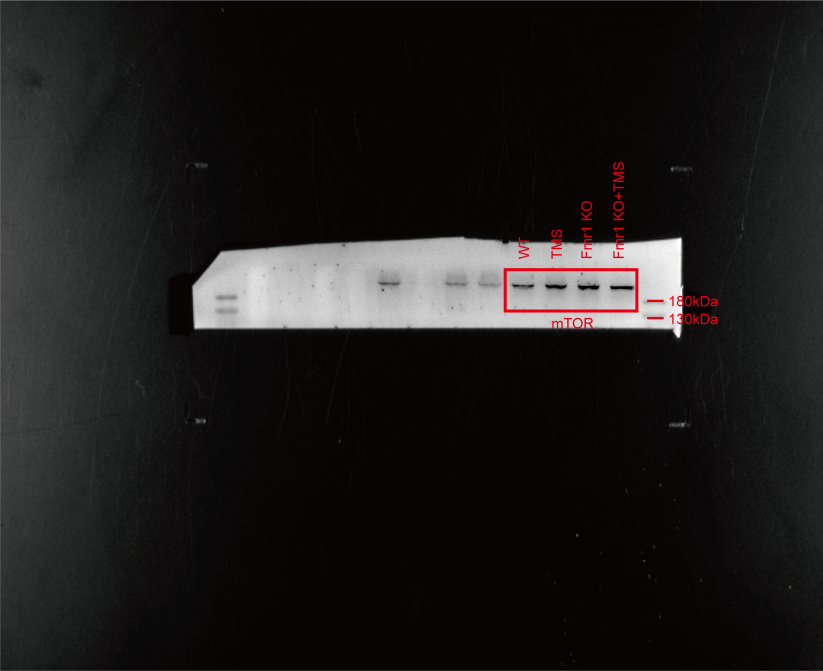

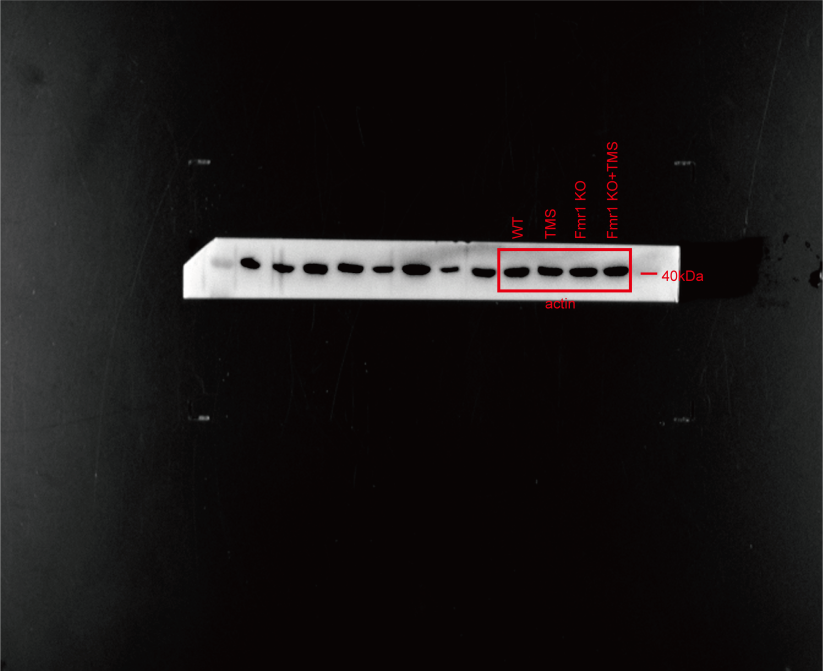

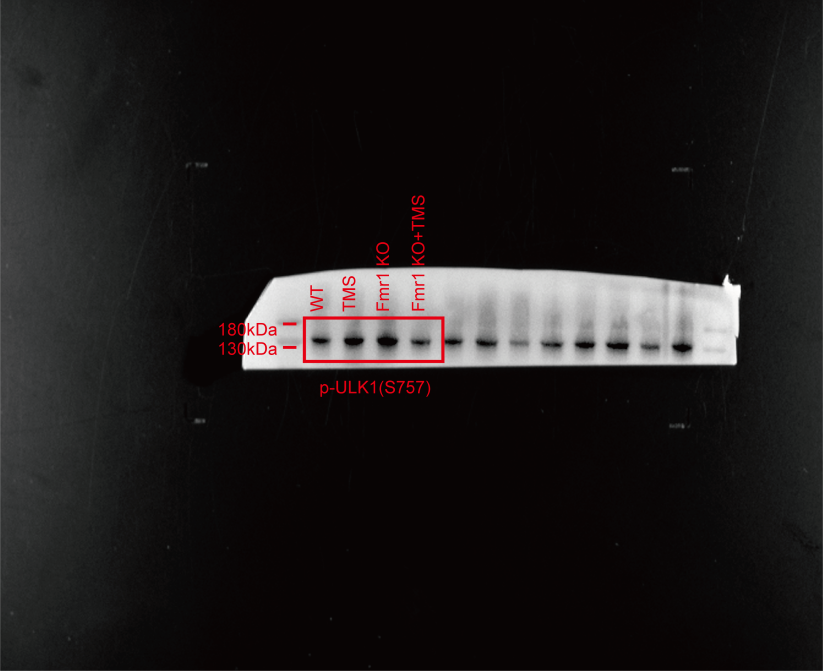

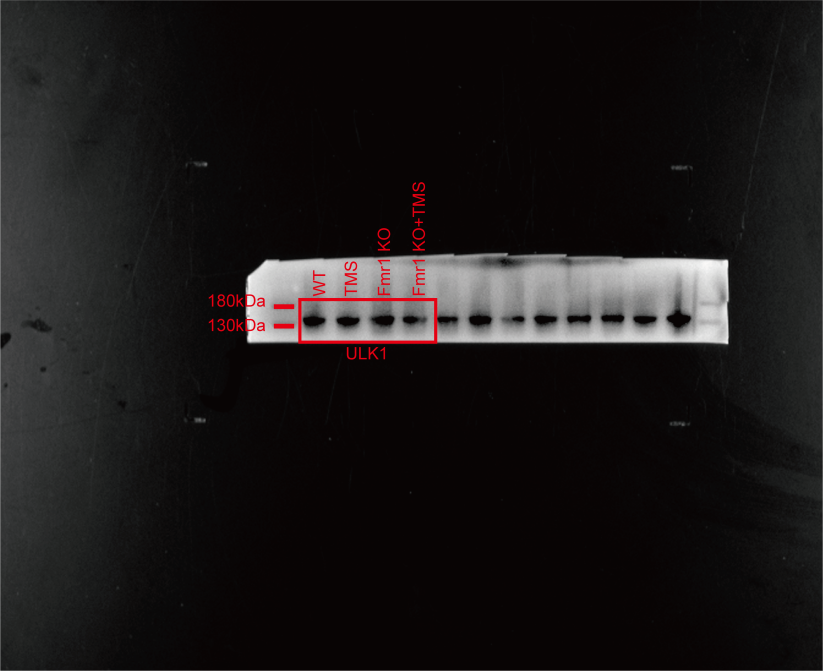

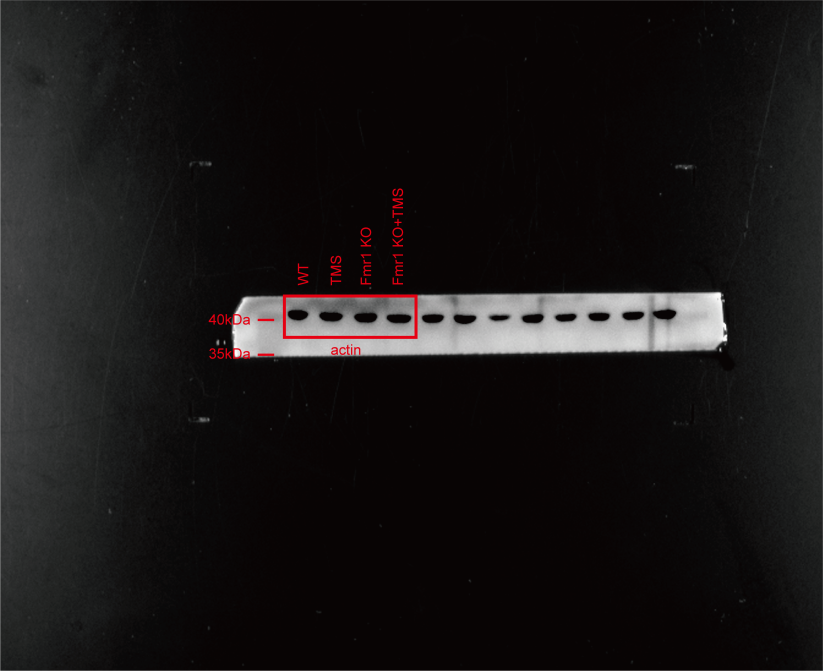

Supplement: Supplementary file 1 [file 54b349d828ebe0b9b7911b3c.docx]
